# Supplementary material for: Patient Perceptions of Vascular Access and Quality of Life in Maintenance Hemodialysis: A Multicenter Study on Patient-Centered Outcomes
Source: MDPI journal article supplement (doi:10.3390/healthcare14050697), 2026-03-09
Supplement: s1 [file healthcare-4142450-supplementary.pdf › healthcare-4142450-supplementary.pdf]

**Table S1.** Demographic and clinical characteristics

|                                                                      |                                        | N            | %    |
|----------------------------------------------------------------------|----------------------------------------|--------------|------|
| Gender                                                               | Male                                   | 100          | 65.8 |
|                                                                      | Female                                 | 52           | 34.2 |
| BMI                                                                  | Normal                                 | 57           | 37.5 |
|                                                                      | Overweight                             | 62           | 40.8 |
|                                                                      | Obese                                  | 33           | 21.7 |
| Age                                                                  | 18-55                                  | 44           | 28.9 |
|                                                                      | ≥ 56                                   | 108          | 71.1 |
| Marital status                                                       | Single                                 | 26           | 17.1 |
|                                                                      | In a relationship/married              | 126          | 82.9 |
| Educational level                                                    | No education / Primary school graduate | 34           | 22.4 |
|                                                                      | Middle school / High school graduate   | 84           | 55.2 |
|                                                                      | University degree / Master / PhD       | 34           | 22.4 |
| How long have you been on hemodialysis?                              | ≤ 6 months                             | 10           | 6.6  |
|                                                                      | 6-12 months                            | 9            | 5.9  |
|                                                                      | 1-2 years                              | 22           | 14.5 |
|                                                                      | 2-5 years                              | 47           | 30.9 |
|                                                                      | ≥ 5 years                              | 64           | 42.1 |
| Most recent urea lab values, Mean (SD)                               |                                        | 134.6 (29.3) |      |
| Most recent creatinine lab values, Mean (SD)                         |                                        | 8.3 (2.6)    |      |
| What type of vascular access do you currently have?                  | Arteriovenous fistula                  | 90           | 59.2 |
|                                                                      | Graft                                  | 14           | 9.2  |
|                                                                      | Temporary dialysis catheter            | 7            | 4.6  |
|                                                                      | Permanent dialysis catheter            | 41           | 27   |
| Are you satisfied with your vascular access?                         | Very                                   | 62           | 40.8 |
|                                                                      | Quite                                  | 81           | 53.3 |
|                                                                      | A little                               | 8            | 5.3  |
|                                                                      | Not at all                             | 1            | 0.7  |
| Which vascular access is considered appropriate for you?             | Arteriovenous fistula                  | 105          | 69.5 |
|                                                                      | Graft                                  | 16           | 10.6 |
|                                                                      | Temporary dialysis catheter            | 3            | 2    |
|                                                                      | Permanent dialysis catheter            | 27           | 17.9 |
| In which hospital or center do you regularly receive your treatment? | Bioclinic                              | 14           | 10.0 |
|                                                                      | Bionefros                              | 7            | 5.0  |
|                                                                      | IASO Thessaly                          | 1            | 0.7  |
|                                                                      | Mesogeios                              | 62           | 44.3 |
|                                                                      | Nefroiatriki                           | 33           | 23.6 |
|                                                                      | Nefros                                 | 7            | 5.0  |
|                                                                      | NNA                                    | 16           | 11.4 |

**Table S2.** Descriptive statistics of SF-36 and MVQoL dimensions

|                                | <b>Minimum</b> | <b>Maximum</b> | <b>Mean</b> | <b>SD</b> |
|--------------------------------|----------------|----------------|-------------|-----------|
| <b>SF-36</b>                   |                |                |             |           |
| 1. Physical functioning        | 0              | 100            | 57.9        | 25.1      |
| 2. Role functioning            | 0              | 100            | 54.1        | 43.3      |
| 3. Bodily pain                 | 10             | 100            | 67.9        | 24.1      |
| 4. General health              | 5              | 207            | 51.4        | 22.6      |
| 5. Vitality                    | 5              | 100            | 56.1        | 16.8      |
| 6. Social function             | 0              | 100            | 66.0        | 23.1      |
| 7. Role emotional              | 0              | 100            | 60.7        | 43.8      |
| 8. Mental health               | 16             | 100            | 66.2        | 17.5      |
| Physical component score (PCS) | 16.7           | 59.1           | 40.9        | 9.4       |
| Mental component score (MCS)   | 18.1           | 66.4           | 46.4        | 9.2       |
| <b>MVQoL</b>                   |                |                |             |           |
| Symptoms                       | -16            | 30             | 6.7         | 7.6       |
| Function                       | -15            | 25             | 7.3         | 8.2       |
| Interpersonal relationships    | -25            | 30             | 15.3        | 10.0      |
| Emotional well-being           | -30            | 30             | -6.6        | 13.9      |
| Transcendence                  | -30            | 30             | 9.8         | 12.1      |
| Overall quality of life score  | 8.6            | 26             | 18.2        | 3.0       |

**Table S3.** Results of multiple linear regression analysis with dependent variables of the dimensions of SF-36 scale.

|                                                                 | Physical functioning    |              | Role functioning         |              | Bodily pain             |              | General health          |              |
|-----------------------------------------------------------------|-------------------------|--------------|--------------------------|--------------|-------------------------|--------------|-------------------------|--------------|
|                                                                 | $\beta$ (95% CI)        | P            | $\beta$ (95% CI)         | P            | $\beta$ (95% CI)        | P            | $\beta$ (95% CI)        | P            |
| <i>Gender</i>                                                   |                         |              |                          |              |                         |              |                         |              |
| Male (reference)                                                |                         |              |                          |              |                         |              |                         |              |
| Female                                                          | -2.38 (-10.76 – 6)      | 0.575        | -1.26 (-16.42 – 13.89)   | 0.869        | -6.2 (-14.52 – 2.13)    | 0.143        | -1.04 (-8.82 – 6.74)    | 0.794        |
| <i>BMI</i>                                                      |                         |              |                          |              |                         |              |                         |              |
| Normal (reference)                                              |                         |              |                          |              |                         |              |                         |              |
| Overweight                                                      | -3.46 (-12.57 – 5.66)   | 0.454        | -4.33 (-20.82 – 12.16)   | 0.605        | 0.8 (-8.25 – 9.86)      | 0.861        | 5.35 (-3.12 – 13.82)    | 0.217        |
| Obese                                                           | -6.68 (-17.19 – 3.83)   | 0.211        | -5.74 (-24.76 – 13.27)   | 0.551        | 2.08 (-8.37 – 12.52)    | 0.695        | 2.06 (-7.7 – 11.82)     | 0.680        |
| <i>Age</i>                                                      |                         |              |                          |              |                         |              |                         |              |
| 18-55 (reference)                                               |                         |              |                          |              |                         |              |                         |              |
| $\geq 56$                                                       | -8.41 (-17.05 – -0.24)  | <b>0.050</b> | -7.3 (-22.94 – 8.34)     | 0.357        | 1.17 (-7.42 – 9.76)     | 0.788        | 1.03 (-6.99 – 9.05)     | 0.803        |
| <i>Single</i>                                                   |                         |              |                          |              |                         |              |                         |              |
| No (reference)                                                  |                         |              |                          |              |                         |              |                         |              |
| Yes                                                             | -8.17 (-18.77 – 2.43)   | 0.130        | -12.05 (-31.23 – -7.13)  | 0.216        | -5.76 (-16.3 – 4.77)    | 0.281        | -6.49 (-16.33 – -3.35)  | 0.198        |
| <i>What is your level of education?</i>                         |                         |              |                          |              |                         |              |                         |              |
| No education / Primary school graduate (reference)              |                         |              |                          |              |                         |              |                         |              |
| Middle school / High school graduate                            | -2.19 (-13.65 – 9.27)   | 0.706        | -33.64 (-54.37 – -12.91) | <b>0.002</b> | 0.98 (-10.41 – 12.36)   | 0.866        | 5.31 (-5.33 – 15.95)    | 0.329        |
| University degree / Mater / PhD                                 | -0.87 (-14.01 – 12.26)  | 0.896        | -13.63 (-37.4 – 10.13)   | 0.259        | 1.69 (-11.35 – 14.74)   | 0.798        | 4.27 (-7.92 – 16.46)    | 0.493        |
| <i>How long have you been on hemodialysis?</i>                  |                         |              |                          |              |                         |              |                         |              |
| $\leq 6$ months (reference)                                     |                         |              |                          |              |                         |              |                         |              |
| 6 months - 5 years                                              | 17.35 (0.8 – 33.9)      | 0.088        | 11.14 (-18.8 – 41.07)    | 0.463        | 23.43 (6.99 – 39.87)    | <b>0.006</b> | 7.23 (-8.14 – 22.6)     | 0.358        |
| $\geq 5$ years                                                  | 15.44 (-1.39 – 32.28)   | 0.072        | 6.82 (-23.63 – 37.28)    | 0.658        | 15.79 (-0.94 – 32.51)   | 0.064        | -2.49 (-18.11 – 13.13)  | 0.755        |
| <i>What type of vascular access do you currently have?</i>      |                         |              |                          |              |                         |              |                         |              |
| Arteriovenous fistula (reference)                               |                         |              |                          |              |                         |              |                         |              |
| Graft                                                           | -10.51 (-31.24 – 10.22) | 0.318        | -9.21 (-46.71 – 28.29)   | 0.628        | -2.22 (-22.81 – 18.37)  | 0.832        | -5.85 (-25.1 – 13.4)    | 0.552        |
| Temporary dialysis catheter                                     | -4.13 (-25.32 – 17.07)  | 0.701        | 4.44 (-33.91 – 42.79)    | 0.819        | 8.86 (-12.2 – 29.92)    | 0.407        | -9.22 (-28.9 – 10.46)   | 0.360        |
| Permanent dialysis catheter                                     | -12.04 (-25.91 – 1.83)  | <b>0.040</b> | 8.22 (-16.87 – 33.32)    | 0.518        | -2.19 (-15.97 – 11.59)  | 0.754        | -7.89 (-20.77 – 4.99)   | 0.232        |
| <i>Are you satisfied with your vascular access?</i>             |                         |              |                          |              |                         |              |                         |              |
| Very (reference)                                                |                         |              |                          |              |                         |              |                         |              |
| Quite                                                           | -8.26 (-16.88 – 0.36)   | 0.060        | -11.63 (-27.21 – 3.96)   | 0.143        | -7.29 (-15.85 – 1.27)   | 0.095        | -11.02 (-19.02 – -3.02) | <b>0.008</b> |
| A little / Not at all                                           | -6.77 (-25.72 – 12.19)  | 0.481        | -24.86 (-59.15 – 9.42)   | 0.154        | -27.09 (-45.92 – -8.26) | <b>0.005</b> | -17.3 (-34.9 – -0.3)    | <b>0.046</b> |
| <i>Which vascular access is considered appropriate for you?</i> |                         |              |                          |              |                         |              |                         |              |
| Arteriovenous fistula (reference)                               |                         |              |                          |              |                         |              |                         |              |
| Graft                                                           | -1.56 (-21.1 – 17.97)   | 0.874        | 7.8 (-27.55 – 43.15)     | 0.663        | -7.89 (-27.3 – 11.52)   | 0.423        | 0.33 (-17.8 – 18.46)    | 0.972        |
| Temporary dialysis catheter                                     | 2.17 (-27.98 – 32.31)   | 0.887        | 22.11 (-32.43 – 76.64)   | 0.424        | 7.6 (-22.35 – 37.55)    | 0.616        | 16.36 (-11.63 – 44.35)  | 0.254        |
| Permanent dialysis catheter                                     | -6.86 (-21.91 – 8.2)    | 0.369        | -17.24 (-44.48 – 10)     | 0.213        | -1.56 (-16.51 – 13.4)   | 0.837        | 2.32 (-11.65 – 16.29)   | 0.745        |
| Adjusted R <sup>2</sup>                                         | 0.12                    |              | 0.06                     |              | 0.09                    |              | 0.09                    |              |
| Durbin-Watson d                                                 | 2.01                    |              | 1.93                     |              | 2.12                    |              | 2.21                    |              |

$\beta$ : regression coefficient 95% CI: 95% Confidence Interval

**Table S3.** Results of multiple linear regression analysis with dependent variables of the dimensions of SF-36 scale (continue).

|                                                                 | Vitality                |              | Social function        |              | Role emotional          |              | Mental health          |              |
|-----------------------------------------------------------------|-------------------------|--------------|------------------------|--------------|-------------------------|--------------|------------------------|--------------|
|                                                                 | $\beta$ (95% CI)        | P            | $\beta$ (95% CI)       | P            | $\beta$ (95% CI)        | P            | $\beta$ (95% CI)       | P            |
| <i>Gender</i>                                                   |                         |              |                        |              |                         |              |                        |              |
| Male (reference)                                                |                         |              |                        |              |                         |              |                        |              |
| Female                                                          | -1.88 (-7.73 – 3.96)    | 0.525        | -0.15 (-7.8 – 7.5)     | 0.969        | -0.84 (-16.26 – 14.58)  | 0.914        | -2.72 (-8.92 – 3.47)   | 0.386        |
| <i>BMI</i>                                                      |                         |              |                        |              |                         |              |                        |              |
| Normal (reference)                                              |                         |              |                        |              |                         |              |                        |              |
| Overweight                                                      | 2.57 (-3.79 – 8.92)     | 0.426        | 0.12 (-8.21 – 8.45)    | 0.977        | 1.3 (-15.48 – 18.07)    | 0.879        | 2.32 (-4.42 – 9.06)    | 0.497        |
| Obese                                                           | 0.47 (-6.86 – 7.81)     | 0.898        | 17.58 (-1.62)          | 0.102        | -13.02 (-32.36 – 6.33)  | 0.185        | 1.06 (-6.71 – 8.83)    | 0.788        |
| <i>Age</i>                                                      |                         |              |                        |              |                         |              |                        |              |
| 18-55 (reference)                                               |                         |              |                        |              |                         |              |                        |              |
| $\geq 56$                                                       | -0.74 (-6.77 – 5.29)    | 0.809        | -3.41 (-11.3 – 4.49)   | 0.395        | -4.5 (-20.41 – 11.41)   | 0.577        | 1.83 (-4.56 – 8.22)    | 0.572        |
| <i>Single</i>                                                   |                         |              |                        |              |                         |              |                        |              |
| No (reference)                                                  |                         |              |                        |              |                         |              |                        |              |
| Yes                                                             | -6.12 (-13.52 – 1.27)   | 0.104        | -6.57 (-16.26 – 3.11)  | 0.182        | -13.87 (-33.39 – 5.65)  | 0.162        | -4.5 (-12.34 – 3.34)   | 0.258        |
| <i>What is your level of education?</i>                         |                         |              |                        |              |                         |              |                        |              |
| No education / Primary school graduate (reference)              |                         |              |                        |              |                         |              |                        |              |
| Middle school / High school graduate                            | 3.35 (-4.64 – 11.34)    | 0.409        | 0.01 (-10.46 – 10.47)  | 0.999        | -23.96 (-45.05 – -2.86) | <b>0.026</b> | 5.91 (-2.57 – 14.38)   | 0.170        |
| University degree / Mater / PhD                                 | 3.49 (-5.67 – 12.65)    | 0.452        | 7.03 (-4.97 – 19.02)   | 0.249        | -6.44 (-30.61 – 17.74)  | 0.599        | 10.3 (0.58 – 20.01)    | <b>0.038</b> |
| <i>How long have you been on hemodialysis?</i>                  |                         |              |                        |              |                         |              |                        |              |
| $\leq 6$ months (reference)                                     |                         |              |                        |              |                         |              |                        |              |
| 6 months - 5 years                                              | 4.5 (-7.04 – 16.04)     | 0.442        | 12.66 (-2.45 – 27.78)  | 0.100        | -2.57 (-33.03 – 27.89)  | 0.868        | -1.21 (-13.45 – 11.02) | 0.845        |
| $\geq 5$ years                                                  | 0.52 (-11.22 – 12.26)   | 0.931        | 7.56 (-7.82 – 22.94)   | 0.333        | -0.45 (-31.44 – 30.54)  | 0.977        | -3.64 (-16.09 – 8.81)  | 0.564        |
| <i>What type of vascular access do you currently have?</i>      |                         |              |                        |              |                         |              |                        |              |
| Arteriovenous fistula (reference)                               |                         |              |                        |              |                         |              |                        |              |
| Graft                                                           | -11.65 (-26.11 – -2.81) | <b>0.035</b> | -6.14 (-25.07 – 12.8)  | 0.523        | 5.23 (-32.92 – 43.38)   | 0.787        | -1.88 (-17.21 – 13.44) | 0.808        |
| Temporary dialysis catheter                                     | -1.42 (-16.21 – 13.36)  | 0.849        | -2.65 (-22.01 – 16.72) | 0.787        | 22.67 (-16.34 – 61.68)  | 0.252        | -2.38 (-18.06 – 13.29) | 0.764        |
| Permanent dialysis catheter                                     | -4.67 (-14.35 – 5)      | 0.341        | -12.82 (-25.49 – 0.15) | <b>0.047</b> | 7.95 (-17.58 – 33.48)   | 0.539        | -2.99 (-13.25 – 7.26)  | 0.565        |
| <i>Are you satisfied with your vascular access?</i>             |                         |              |                        |              |                         |              |                        |              |
| Very (reference)                                                |                         |              |                        |              |                         |              |                        |              |
| Quite                                                           | -9.99 (-16 – -3.98)     | <b>0.001</b> | -12.91 (-20.78 – 5.04) | <b>0.001</b> | -7.54 (-23.4 – 8.32)    | 0.349        | -6.29 (-12.67 – -0.08) | <b>0.050</b> |
| A little / Not at all                                           | -7.26 (-20.48 – 5.95)   | 0.279        | -9.94 (-27.25 – 7.37)  | 0.258        | -24.47 (-59.35 – 10.42) | 0.168        | -12.34 (-26.35 – 1.67) | 0.084        |
| <i>Which vascular access is considered appropriate for you?</i> |                         |              |                        |              |                         |              |                        |              |
| Arteriovenous fistula (reference)                               |                         |              |                        |              |                         |              |                        |              |
| Graft                                                           | 4.96 (-8.66 – 18.59)    | 0.472        | -6.4 (-24.24 – 11.45)  | 0.480        | -5.65 (-41.61 – 30.31)  | 0.756        | -2.76 (-17.21 – 11.68) | 0.706        |
| Temporary dialysis catheter                                     | 8.01 (-13.01 – 29.03)   | 0.452        | 13.22 (-14.31 – 40.75) | 0.344        | 37.44 (-18.04 – 92.92)  | 0.184        | 3.92 (-18.37 – 26.21)  | 0.729        |

|                             |                      |       |                        |       |                        |       |                     |       |
|-----------------------------|----------------------|-------|------------------------|-------|------------------------|-------|---------------------|-------|
| Permanent dialysis catheter | 1.11 (-9.38 – 11.61) | 0.834 | -0.78 (-14.53 – 12.97) | 0.911 | -21.56 (-49.27 – 6.15) | 0.126 | -1.13 (-12.27 – 10) | 0.841 |
| Adjusted R <sup>2</sup>     | 0.08                 |       | 0.16                   |       | 0.04                   |       | 0.04                |       |
| Durbin-Watson d             | 1.98                 |       | 1.92                   |       | 1.95                   |       | 2.06                |       |

$\beta$ : regression coefficient 95% CI: 95% Confidence Interval

**Table S3.** Results of multiple linear regression analysis with dependent variables of the dimensions of SF-36 scale (continue).

|                                                                 | PCS                   |              | MCS                   |              |
|-----------------------------------------------------------------|-----------------------|--------------|-----------------------|--------------|
|                                                                 | $\beta$ (95% CI)      | P            | $\beta$ (95% CI)      | P            |
| <i>Gender</i>                                                   |                       |              |                       |              |
| Male (reference)                                                |                       |              |                       |              |
| Female                                                          | -1.18 (-4.36 – 2.00)  | 0.468        | -0.53 (-3.78 – 2.72)  | 0.752        |
| <i>BMI</i>                                                      |                       |              |                       |              |
| Normal (reference)                                              |                       |              |                       |              |
| Overweight                                                      | -0.65 (-4.1 – 2.8)    | 0.715        | 1.53 (-2.02 – 5.08)   | 0.399        |
| Obese                                                           | -0.64 (-4.62 – 3.34)  | 0.754        | -1.55 (-5.65 – 2.55)  | 0.458        |
| <i>Age</i>                                                      |                       |              |                       |              |
| 18-55 (reference)                                               |                       |              |                       |              |
| $\geq 56$                                                       | -1.99 (-5.26 – 1.28)  | 0.235        | 0.46 (-2.91 – 3.83)   | 0.787        |
| <i>Sinlge</i>                                                   |                       |              |                       |              |
| No (reference)                                                  |                       |              |                       |              |
| Yes                                                             | -3.05 (-7.07 – 0.97)  | 0.139        | -2.97 (-7.09 – 1.15)  | 0.161        |
| <i>What is your level of education?</i>                         |                       |              |                       |              |
| No education / Primary school graduate (reference)              |                       |              |                       |              |
| Middle school / High school graduate                            | -2.4 (-6.73 – 1.93)   | 0.281        | 0.19 (-4.26 – 4.64)   | 0.934        |
| University degree / Mater / PhD                                 | -1.68 (-6.66 – 3.3)   | 0.508        | 3.65 (-1.47 – 8.77)   | 0.164        |
| <i>How long have you been on hemodialysis?</i>                  |                       |              |                       |              |
| $\leq 6$ months (reference)                                     |                       |              |                       |              |
| 6 months - 5 years                                              | 8.74 (2.47 – 15.01)   | <b>0.007</b> | -1.81 (-8.24 – 4.62)  | 0.583        |
| $\geq 5$ years                                                  | 5.84 (-0.53 – 12.21)  | 0.075        | -2.51 (-9.06 – 4.04)  | 0.454        |
| <i>What type of vascular access do you currently have?</i>      |                       |              |                       |              |
| Arteriovenous fistula (reference)                               |                       |              |                       |              |
| Graft                                                           | -4.14 (-12 – 3.72)    | 0.303        | -0.34 (-8.4 – 7.72)   | 0.934        |
| Temporary dialysis catheter                                     | -1.29 (-9.33 – 6.75)  | 0.754        | 1.82 (-6.43 – 10.07)  | 0.666        |
| Permanent dialysis catheter                                     | -2.76 (-8.01 – 2.49)  | 0.304        | -0.77 (-6.16 – 4.62)  | 0.781        |
| <i>Are you satisfied with your vascular access?</i>             |                       |              |                       |              |
| Very (reference)                                                |                       |              |                       |              |
| Quite                                                           | -3.97 (-7.24 – -0.7)  | <b>0.019</b> | -3.73 (-7.08 – -0.38) | <b>0.031</b> |
| A little / Not at all                                           | -6.76 (-13.93 – 0.41) | 0.067        | -5.72 (-13.09 – 1.65) | 0.131        |
| <i>Which vascular access is considered appropriate for you?</i> |                       |              |                       |              |
| Arteriovenous fistula (reference)                               |                       |              |                       |              |
| Graft                                                           | 0.26 (-7.15 – 7.67)   | 0.946        | -1.5 (-9.1 – 6.1)     | 0.699        |
| Temporary dialysis catheter                                     | 3.16 (-8.27 – 14.59)  | 0.589        | 7 (-4.72 – 18.72)     | 0.244        |
| Permanent dialysis catheter                                     | -1.57 (-7.27 – 4.13)  | 0.589        | -1.74 (-7.6 – 4.12)   | 0.560        |
| Adjusted R <sup>2</sup>                                         | 0.09                  |              | 0.02                  |              |
| Durbin-Watson d                                                 | 2.01                  |              | 1.90                  |              |

 $\beta$ : regression coefficient 95% CI: 95% Confidence Interval

**Table S4.** Results of multiple linear regression analysis with dependent variables of the dimensions of MVQoL scale

|                                                                 | Symptoms              |        | Function             |              | Interpersonal relationships |        |
|-----------------------------------------------------------------|-----------------------|--------|----------------------|--------------|-----------------------------|--------|
|                                                                 | $\beta$ (95% CI)      | P      | $\beta$ (95% CI)     | P            | $\beta$ (95% CI)            | P      |
| <i>Gender</i>                                                   |                       |        |                      |              |                             |        |
| Male (reference)                                                |                       |        |                      |              |                             |        |
| Female                                                          | -2.56 (-5.12 – 0)     | 0.050  | -1.7 (-4.59 – 1.19)  | 0.246        | 1.49 (-1.85 – 4.83)         | 0.380  |
| <i>BMI</i>                                                      |                       |        |                      |              |                             |        |
| Normal (reference)                                              |                       |        |                      |              |                             |        |
| Overweight                                                      | 0.11 (-2.67 – 2.9)    | 0.937  | 0.1 (-3.05 – 3.25)   | 0.950        | -0.01 (-3.65 – 3.62)        | 0.995  |
| Obese                                                           | -1.2 (-4.41 – 2.01)   | 0.460  | -4.97 (-8.6 – -1.35) | <b>0.008</b> | -1.83 (-6.02 – 2.37)        | 0.391  |
| <i>Age</i>                                                      |                       |        |                      |              |                             |        |
| 18-55 (reference)                                               |                       |        |                      |              |                             |        |
| $\geq 56$                                                       | 0.94 (-1.7 – 3.58)    | 0.484  | 1.01 (-1.98 – 3.99)  | 0.506        | 1.79 (-1.66 – 5.23)         | 0.307  |
| <i>Single</i>                                                   |                       |        |                      |              |                             |        |
| No (reference)                                                  |                       |        |                      |              |                             |        |
| Yes                                                             | -1.5 (-4.74 – 1.74)   | 0.362  | 0.02 (-3.64 – 3.68)  | 0.992        | -10.17 (-14.4 – -5.94)      | <0.001 |
| <i>What is your level of education?</i>                         |                       |        |                      |              |                             |        |
| No education / Primary school graduate (reference)              |                       |        |                      |              |                             |        |
| Middle school / High school graduate                            | 6.45 (2.95 – 9.95)    | <0.001 | -1.12 (-5.08 – 2.83) | 0.575        | 3.31 (-1.26 – 7.88)         | 0.154  |
| University degree / Mater / PhD                                 | 6.64 (2.63 – 10.66)   | 0.001  | 2.28 (-2.25 – 6.82)  | 0.321        | 1.41 (-3.83 – 6.64)         | 0.596  |
| <i>How long have you been on hemodialysis?</i>                  |                       |        |                      |              |                             |        |
| $\leq 6$ months (reference)                                     |                       |        |                      |              |                             |        |
| 6 months - 5 years                                              | -1.36 (-6.41 – 3.7)   | 0.597  | 0.45 (-5.26 – 6.16)  | 0.877        | 2.61 (-3.99 – 9.21)         | 0.435  |
| $\geq 5$ years                                                  | -2.03 (-7.18 – 3.11)  | 0.436  | 2.69 (-3.12 – 8.5)   | 0.361        | 2.69 (-4.03 – 9.4)          | 0.430  |
| <i>What type of vascular access do you currently have?</i>      |                       |        |                      |              |                             |        |
| Arteriovenous fistula (reference)                               |                       |        |                      |              |                             |        |
| Graft                                                           | 0.2 (-6.14 – 6.53)    | 0.951  | -2.01 (-9.16 – 5.15) | 0.580        | 0.33 (-7.94 – 8.59)         | 0.938  |
| Temporary dialysis catheter                                     | -3.38 (-9.86 – 3.1)   | 0.304  | 4.79 (-2.53 – 12.1)  | 0.198        | -1.13 (-9.59 – 7.32)        | 0.792  |
| Permanent dialysis catheter                                     | -1.58 (-5.82 – 2.66)  | 0.461  | -1.72 (-6.51 – 3.07) | 0.478        | -1.92 (-7.46 – 3.61)        | 0.493  |
| <i>Are you satisfied with your vascular access?</i>             |                       |        |                      |              |                             |        |
| Very (reference)                                                |                       |        |                      |              |                             |        |
| Quite                                                           | -2.34 (-4.97 – 0.29)  | 0.081  | 1.61 (-1.36 – 4.59)  | 0.285        | -2.58 (-6.01 – 0.86)        | 0.140  |
| A little / Not at all                                           | -2.47 (-8.27 – 3.32)  | 0.400  | 5.16 (-1.38 – 11.7)  | 0.121        | -8.01 (-15.57 – -0.45)      | 0.038  |
| <i>Which vascular access is considered appropriate for you?</i> |                       |        |                      |              |                             |        |
| Arteriovenous fistula (reference)                               |                       |        |                      |              |                             |        |
| Graft                                                           | -1.13 (-7.1 – 4.84)   | 0.708  | -1.2 (-7.94 – 5.54)  | 0.726        | -2.38 (-10.17 – 5.42)       | 0.548  |
| Temporary dialysis catheter                                     | -2.97 (-12.18 – 6.24) | 0.525  | 2.08 (-8.32 – 12.49) | 0.693        | 1.54 (-10.49 – 13.56)       | 0.801  |
| Permanent dialysis catheter                                     | 3.1 (-1.5 – 7.7)      | 0.185  | 0.64 (-4.56 – 5.83)  | 0.809        | 2.13 (-3.88 – 8.13)         | 0.485  |
| Adjusted R <sup>2</sup>                                         | 0.14                  |        | 0.06                 |              | 0.14                        |        |
| Durbin-Watson d                                                 | 2.09                  |        | 2.02                 |              | 1.98                        |        |

$\beta$ : regression coefficient 95% CI: 95% Confidence Interval

**Table S4.** Results of multiple linear regression analysis with dependent variables of the dimensions of MVQoL scale (continue)

|                                                                 | Emotional well-being  |       | Transcendence           |              | Overall quality of life score |              |
|-----------------------------------------------------------------|-----------------------|-------|-------------------------|--------------|-------------------------------|--------------|
|                                                                 | $\beta$ (95% CI)      | P     | $\beta$ (95% CI)        | P            | $\beta$ (95% CI)              | P            |
| <i>Gender</i>                                                   |                       |       |                         |              |                               |              |
| Male (reference)                                                |                       |       |                         |              |                               |              |
| Female                                                          | 3.14 (-1.86 – 8.14)   | 0.217 | -2.81 (-6.86 – 1.24)    | 0.172        | -0.25 (-1.26 – 0.77)          | 0.634        |
| <i>BMI</i>                                                      |                       |       |                         |              |                               |              |
| Normal (reference)                                              |                       |       |                         |              |                               |              |
| Overweight                                                      | 4.12 (-1.32 – 9.55)   | 0.137 | 0.3 (-4.11 – 4.7)       | 0.894        | 0.46 (-0.65 – 1.57)           | 0.411        |
| Obese                                                           | 2.28 (-3.98 – 8.54)   | 0.472 | -1.16 (-6.23 – 3.91)    | 0.651        | -0.69 (-1.96 – 0.59)          | 0.287        |
| <i>Age</i>                                                      |                       |       |                         |              |                               |              |
| 18-55 (reference)                                               |                       |       |                         |              |                               |              |
| ≥ 56                                                            | 3.33 (-1.81 – 8.47)   | 0.202 | -1.75 (-5.91 – 2.41)    | 0.406        | 0.53 (-0.52 – 1.58)           | 0.318        |
| <i>Single</i>                                                   |                       |       |                         |              |                               |              |
| No (reference)                                                  |                       |       |                         |              |                               |              |
| Yes                                                             | 4 (-2.3 – 10.31)      | 0.211 | -6.08 (-11.19 – 0.98)   | <b>0.020</b> | -1.37 (-2.66 – 0.09)          | <b>0.036</b> |
| <i>What is your level of education?</i>                         |                       |       |                         |              |                               |              |
| No education / Primary school graduate (reference)              |                       |       |                         |              |                               |              |
| Middle school / High school graduate                            | 1.67 (-5.16 – 8.5)    | 0.629 | 0.55 (-4.98 – 6.08)     | 0.843        | 1.09 (-0.3 – 2.48)            | 0.125        |
| University degree / Mater / PhD                                 | 4.78 (-3.03 – 12.59)  | 0.228 | 1.74 (-4.59 – 8.06)     | 0.588        | 1.68 (0.09 – 3.27)            | <b>0.038</b> |
| <i>How long have you been on hemodialysis?</i>                  |                       |       |                         |              |                               |              |
| ≤ 6 months (reference)                                          |                       |       |                         |              |                               |              |
| 6 months - 5 years                                              | 6.2 (-3.65 – 16.04)   | 0.215 | 0.15 (-7.82 – 8.12)     | 0.970        | 0.8 (-1.2 – 2.81)             | 0.429        |
| ≥ 5 years                                                       | 2.62 (-7.38 – 12.63)  | 0.605 | -2.24 (-10.35 – 5.86)   | 0.585        | 0.37 (-1.66 – 2.41)           | 0.718        |
| <i>What type of vascular access do you currently have?</i>      |                       |       |                         |              |                               |              |
| Arteriovenous fistula (reference)                               |                       |       |                         |              |                               |              |
| Graft                                                           | -3.65 (-15.97 – 8.68) | 0.559 | -0.24 (-10.21 – 9.74)   | 0.963        | -0.54 (-3.04 – 1.97)          | 0.673        |
| Temporary dialysis catheter                                     | -5.52 (-18.13 – 7.09) | 0.388 | 5.45 (-4.76 – 15.67)    | 0.293        | 0.02 (-2.55 – 2.59)           | 0.987        |
| Permanent dialysis catheter                                     | -3.06 (-11.31 – 5.18) | 0.464 | 2.93 (-3.75 – 9.6)      | 0.388        | -0.54 (-2.22 – 1.14)          | 0.528        |
| <i>Are you satisfied with your vascular access?</i>             |                       |       |                         |              |                               |              |
| Very (reference)                                                |                       |       |                         |              |                               |              |
| Quite                                                           | -4.73 (-9.86 – 0.41)  | 0.071 | -6.4 (-10.56 – 2.25)    | <b>0.003</b> | -1.44 (-2.49 – 0.4)           | <b>0.007</b> |
| A little / Not at all                                           | -9.76 (-21.03 – 1.51) | 0.089 | -15.84 (-24.96 – -6.72) | <b>0.001</b> | -3.09 (-5.39 – 0.8)           | <b>0.009</b> |
| <i>Which vascular access is considered appropriate for you?</i> |                       |       |                         |              |                               |              |
| Arteriovenous fistula (reference)                               |                       |       |                         |              |                               |              |
| Graft                                                           | 8.32 (-3.29 – 19.93)  | 0.159 | -4 (-13.41 – 5.4)       | 0.401        | -0.04 (-2.4 – 2.33)           | 0.974        |
| Temporary dialysis catheter                                     | 7.61 (-10.31 – 25.54) | 0.402 | 1.05 (-13.46 – 15.56)   | 0.887        | 0.93 (-2.72 – 4.58)           | 0.615        |
| Permanent dialysis catheter                                     | 1.76 (-7.24 – 10.77)  | 0.699 | -8.59 (-15.88 – 1.3)    | <b>0.021</b> | -0.1 (-1.93 – 1.74)           | 0.916        |
| Adjusted R <sup>2</sup>                                         | 0.02                  |       | 0.15                    |              | 0.11                          |              |
| Durbin-Watson d                                                 | 1.86                  |       | 1.73                    |              | 1.7                           |              |

$\beta$ : regression coefficient 95% CI: 95% Confidence Interval
